# Supplementary material for: Commercial Antivenoms Exert Broad Paraspecific Immunological Binding and In Vitro Inhibition of Medically Important Bothrops Pit Viper Venoms
Source: Toxins (Basel). 2022 Dec 20;15(1):1. doi: 10.3390/toxins15010001 (PMC9862972; doi:10.3390/toxins15010001)
Supplement: Supplementary file 1 [file toxins-15-00001-s001.zip › toxins-2043404-supplementary S1.xlsx]

## Sheet: ELISA EPT
		Soro anticrotálico		Soro antibotrópico-crotálico		Bothrofav		PoliVap-ICP 2006		PoliVap-ICP 2013		Normal horse IgG
B. atrox (Colombia)	1:100	1.6775	1.704	1.7873	1.8626	1.647	1.7589	2.2336	2.3556	2.3089	1.807	0.1127	0.1136
	1:500	1.43	1.5229	1.766	1.7877	1.5345	1.788	2.151	2.2014	2.1197	1.9821	0.1114	0.1127
	1:2500	1.0984	1.2108	1.5834	1.5868	1.3148	1.6818	2.0415	2.0519	1.9158	1.7033	0.1096	0.1123
	1:12500	0.7194	0.7701	1.2976	1.3442	1.0855	1.5033	1.8032	1.9247	1.6471	1.2205	0.1113	0.1136
	1:62500	0.3388	0.4064	0.8477	0.9627	0.7689	0.9697	1.203	1.2578	0.8932	0.6242	0.1154	0.1145
	1:312500	0.1661	0.1946	0.3796	0.4237	0.5288	0.5609	0.3735	0.3701	0.2628	0.2198	0.1114	0.1122
	1:1562500	0.1236	0.133	0.1769	0.1983	0.2408	0.2293	0.1722	0.1676	0.1582	0.1516	0.1135	0.1151
	1:7812500	0.1165	0.1197	0.1304	0.1321	0.2082	0.151	0.1335	0.1305	0.1357	0.1334	0.1164	0.1146
	1:39062500	0.1173	0.1152	0.1201	0.1187	0.1826	0.1368	0.1331	0.1246	0.1256	0.1269	0.1131	0.1143
	195312500	0.1112	0.1118	0.1184	0.1126	0.1385	0.1304	0.1337	0.1223	0.129	0.1354	0.1147	0.116
	Buffer only	0.1107	0.0976	0.116	0.1044	0.1324	0.1207	0.1328	0.1227	0.1357	0.1384	0.1161	0.1147
B. atrox (Guyana)	1:100	1.6919	1.6886	1.766	1.781	1.6947	1.722	1.9166	1.8985	1.9481	1.9491	0.1072	0.104
	1:500	1.5477	1.5487	1.7243	1.7412	1.6103	1.7377	1.9212	1.8923	1.9005	1.9018	0.1075	0.1056
	1:2500	1.1944	1.1194	1.6303	1.6359	1.494	1.6282	1.8887	1.782	1.8099	1.8009	0.1144	0.1117
	1:12500	0.7204	0.7184	1.4627	1.4686	1.44	1.5749	1.7234	1.6545	1.4654	1.546	0.112	0.1145
	1:62500	0.3291	0.3313	1.0552	1.0722	1.3204	1.3217	1.1058	0.9674	0.6176	0.7633	0.116	0.1161
	1:312500	0.1691	0.1604	0.571	0.5244	0.5786	0.8536	0.3857	0.3257	0.2217	0.267	0.1137	0.1155
	1:1562500	0.1224	0.1141	0.2671	0.2246	0.2481	0.3538	0.1735	0.1571	0.1372	0.1497	0.112	0.1134
	1:7812500	0.1146	0.1037	0.1616	0.1407	0.1465	0.1588	0.1203	0.125	0.1215	0.1238	0.111	0.1117
	1:39062500	0.112	0.0907	0.1254	0.1131	0.1225	0.1264	0.1192	0.1201	0.1198	0.1198	0.1132	0.1139
	195312500	0.113	0.1031	0.1158	0.1103	0.1131	0.1158	0.2442	0.1136	0.1176	0.1208	0.1151	0.1095
	Buffer only	0.114	0.0648	0.1186	0.1134	0.1162	0.1164	0.1173	0.1133	0.1167	0.1147	0.1154	0.1066
B. atrox (Suriname)	1:100	1.6525	1.7142	1.7996	1.7497	2.0548	2.0205	2.3496	2.2973	2.3371	2.3834	0.1285	0.109
	1:500	1.5138	1.5391	1.6869	1.7388	2.1087	2.1577	2.5292	2.4463	2.4217	2.4793	0.1128	0.1086
	1:2500	1.1716	1.1666	1.6634	1.6403	2.0092	2.0714	2.4313	2.4146	2.3727	2.4538	0.1087	0.1136
	1:12500	0.6048	0.6509	1.4285	1.4646	1.96	2.0443	2.0943	2.1486	1.9296	1.9767	0.1123	0.1111
	1:62500	0.236	0.2707	0.981	1.0048	1.623	1.9099	1.1628	1.1157	0.7911	0.871	0.1165	0.1155
	1:312500	0.1455	0.1593	0.5274	0.5203	0.6771	1.3647	0.411	0.3811	0.2779	0.3159	0.1147	0.1171
	1:1562500	0.1175	0.122	0.235	0.2476	0.2879	0.6587	0.2168	0.1844	0.1684	0.1726	0.1129	0.1176
	1:7812500	0.1117	0.1138	0.1425	0.1411	0.1642	0.2824	0.1695	0.1762	0.1467	0.1457	0.1157	0.1139
	1:39062500	0.1131	0.1134	0.1182	0.1205	0.1616	0.1635	0.1345	0.1654	0.1433	0.1521	0.1165	0.1159
	195312500	0.1077	0.1146	0.1158	0.1137	0.1346	0.1346	0.1345	0.1387	0.1347	0.1321	0.1189	0.1176
	Buffer only	0.1075	0.0762	0.1155	0.114	0.1339	0.1274	0.1358	0.1337	0.1357	0.1294	0.1151	0.116
B. asper (Costa Rica)	1:100	1.8979	1.8932	1.972	1.9716	1.8734	1.8663	2.273	2.1989	2.2076	2.2371	0.1243	0.1232
	1:500	1.6239	1.7266	1.9824	1.985	1.8624	1.8781	2.2428	2.2601	2.2191	2.2697	0.1223	0.1189
	1:2500	1.2945	1.4435	1.8571	1.8514	1.7046	1.8306	2.2278	2.2658	2.2364	2.2371	0.118	0.1175
	1:12500	0.8139	0.852	1.5912	1.6134	1.5724	1.6908	1.994	2.1055	2.0173	1.9783	0.1168	0.1231
	1:62500	0.3627	0.3664	1.1273	1.0825	1.0727	1.2692	1.3524	1.4734	1.2348	1.2656	0.1227	0.1244
	1:312500	0.1772	0.1886	0.6022	0.5433	0.5167	0.6647	0.5261	0.5918	0.4754	0.5069	0.1206	0.1234
	1:1562500	0.112	0.1255	0.2888	0.2669	0.2415	0.2322	0.1839	0.2755	0.23	0.2421	0.1235	0.1258
	1:7812500	0.0996	0.1061	0.1623	0.1562	0.2057	0.1549	0.1395	0.1458	0.1826	0.2029	0.1184	0.1223
	1:39062500	0.0922	0.0927	0.1119	0.1185	0.16	0.1367	0.1307	0.1301	0.1466	0.1863	0.1148	0.117
	195312500	0.1115	0.1123	0.1148	0.1213	0.1885	0.1287	0.1293	0.127	0.1433	0.1583	0.1251	0.1227
	Buffer only	0.1009	0.0896	0.1001	0.1071	0.1284	0.1298	0.1344	0.1261	0.1445	0.13	0.1194	0.1194
B. caribbaeus (St. Lucia)	1:100	1.5974	1.6093	1.7316	1.742	1.9007	1.9008	2.1869	2.1977	2.2051	2.2597	0.1148	0.114
	1:500	1.3869	1.4731	1.6943	1.718	1.849	1.8404	2.11	2.1487	2.1406	2.1858	0.11	0.108
	1:2500	1.1157	1.1304	1.6138	1.6198	1.8221	1.8554	2.0672	2.085	2.019	2.017	0.1286	0.1148
	1:12500	0.7279	0.6961	1.407	1.4486	1.7725	1.8195	1.762	1.7893	1.5521	1.509	0.12	0.1099
	1:62500	0.374	0.3293	0.9439	0.9031	1.5088	1.6597	0.9631	1.0153	0.6456	0.7095	0.1149	0.1152
	1:312500	0.2103	0.1845	0.4481	0.414	0.8481	1.035	0.3448	0.3902	0.3151	0.2986	0.1141	0.1155
	1:1562500	0.1483	0.1341	0.2181	0.1929	0.3136	0.4151	0.1678	0.1727	0.2676	0.2107	0.1134	0.1127
	1:7812500	0.1234	0.121	0.1431	0.1347	0.1461	0.1712	0.1289	0.1386	0.142	0.1944	0.1155	0.1177
	1:39062500	0.1168	0.1189	0.1236	0.1195	0.1265	0.1244	0.1221	0.124	0.1498	0.2308	0.1183	0.1165
	195312500	0.1157	0.1178	0.1168	0.1183	0.1829	0.1181	0.1294	0.1206	0.14	0.1437	0.1181	0.1186
	Buffer only	0.1131	0.1005	0.0977	0.1062	0.1399	0.1483	0.1455	0.165	0.1782	0.1356	0.101	0.1035
B. jararaca (Brazil)	1:100	1.7507	1.7744	1.8979	2.0159	1.9769	1.9885	2.353	2.323	2.3388	2.3131	0.1207	0.1171
	1:500	1.6179	1.6952	1.921	1.9624	1.927	2.023	2.2884	2.2488	2.2436	2.2893	0.1219	0.1187
	1:2500	1.3383	1.3841	1.8923	1.977	1.8591	2.0331	2.2558	2.2378	2.1737	2.1845	0.1172	0.1184
	1:12500	0.7566	0.7992	1.6646	1.7509	1.6879	2.0205	2.0006	1.994	1.7843	1.8138	0.1174	0.1165
	1:62500	0.2923	0.311	1.084	1.2065	1.2569	1.5787	1.104	1.073	0.7721	0.8728	0.1205	0.116
	1:312500	0.1594	0.1575	0.4284	0.4679	0.5563	0.6812	0.3371	0.3358	0.2987	0.3812	0.1225	0.1217
	1:1562500	0.1282	0.1302	0.1908	0.1995	0.2553	0.2454	0.1593	0.2216	0.1945	0.2366	0.1237	0.1212
	1:7812500	0.1232	0.1228	0.1383	0.1383	0.1769	0.1549	0.1364	0.1757	0.2236	0.2287	0.1243	0.1224
	1:39062500	0.1221	0.1225	0.1285	0.1277	0.1514	0.1346	0.1306	0.1974	0.1681	0.16	0.1264	0.1234
	195312500	0.1216	0.1231	0.1232	0.1229	0.1265	0.1287	0.1285	0.1288	0.1316	0.1399	0.1264	0.1222
	Buffer only	0.1242	0.1214	0.1292	0.1334	0.131	0.1298	0.1277	0.128	0.1325	0.1463	0.1249	0.121
B. lanceolatus (Martinique)	1:100	2.2358	2.2947	2.4312	2.365	2.0696	2.0718	2.4005	2.3486	2.2952	2.1612	0.1284	0.1217
	1:500	2.1686	2.2795	2.4883	2.4834	2.0377	2.0635	2.381	2.3486	2.2844	2.2388	0.1207	0.1178
	1:2500	1.8568	1.8732	2.3865	2.4786	2.0309	2.0527	2.2856	2.2245	2.1119	2.0984	0.125	0.1493
	1:12500	1.181	1.1615	2.1032	2.1859	1.9838	2.0062	1.9039	1.8918	1.5431	1.5352	0.1246	0.1224
	1:62500	0.491	0.431	1.23	1.3471	1.7835	1.8698	0.8936	0.958	0.592	0.5816	0.1192	0.1195
	1:312500	0.2108	0.1855	0.4345	0.482	1.0428	1.3093	0.2875	0.3198	0.218	0.2149	0.1212	0.1238
	1:1562500	0.1468	0.139	0.1907	0.2047	0.3517	0.4937	0.1499	0.1634	0.1432	0.1418	0.1239	0.1224
	1:7812500	0.1308	0.1285	0.136	0.1398	0.1717	0.216	0.1343	0.1321	0.1275	0.1273	0.1216	0.1267
	1:39062500	0.1307	0.1253	0.1259	0.1254	0.1357	0.142	0.1277	0.1262	0.1281	0.1267	0.1236	0.1242
	195312500	0.125	0.1263	0.1232	0.1227	0.126	0.127	0.1267	0.1265	0.1248	0.125	0.1203	0.1223
	Buffer only	0.1224	0.1196	0.1219	0.1197	0.1274	0.1248	0.1278	0.126	0.1266	0.1238	0.1259	0.126

## Sheet: ELISA avidity
		Soro anticrotálico		Soro antibotrópico-crotálico		Bothrofav		PoliVap-ICP 2006		PoliVap-ICP 2013		Normal horse IgG
B. atrox (Colombia)	0M	0.9313	0.9439	1.4304	1.4026	1.8177	1.8311	2.2389	2.2429	2.2118	2.1776	0.1183	0.1146
	2M	0.7163	0.7091	1.2138	1.1671	1.7337	1.7477	2.1123	2.0701	2.0001	1.9999	0.1186	0.1172
	4M	0.4371	0.4894	0.9233	0.9122	1.5065	1.5994	1.8169	1.803	1.6617	1.6869	0.1205	0.1173
	6M	0.2834	0.3141	0.6224	0.6162	1.1584	1.1426	1.3741	1.3665	1.141	1.146	0.1187	0.1164
	8M	0.1878	0.1976	0.3739	0.3914	0.6927	0.6965	0.8943	0.9066	0.6773	0.6958	0.1114	0.1152
B. atrox (Guyana)	0M	0.9767	0.9985	1.6133	1.5251	2.0333	2.03	2.2351	2.262	2.1459	2.1294	0.1155	0.1174
	2M	0.7793	0.7535	1.4759	1.449	1.8911	1.8536	2.0254	2.1161	1.9031	1.9118	0.1246	0.1213
	4M	0.5139	0.5048	1.2478	1.2263	1.4909	1.4819	1.5328	1.5486	1.3126	1.321	0.1234	0.12
	6M	0.3252	0.3163	0.922	0.91	0.9613	0.9782	0.9433	0.9822	0.7288	0.7792	0.1187	0.12
	8M	0.2052	0.195	0.5081	0.5316	0.529	0.519	0.5231	0.5315	0.4147	0.4277	0.125	0.121
B. atrox (Suriname)	0M	1.0027	1.0208	1.8305	1.8034	1.6447	1.8282	2.0199	2.0442	1.9328	1.8929	0.124	0.1184
	2M	0.6993	0.7854	1.6853	1.7016	1.8302	1.8759	1.9879	1.8897	1.7599	1.7262	0.1255	0.1215
	4M	0.5167	0.5352	1.4693	1.4818	1.6991	1.7028	1.5699	1.5576	1.3454	1.2608	0.1262	0.1219
	6M	0.3239	0.3353	1.0742	1.0507	1.4033	1.3595	1.0316	0.8978	0.7048	0.7018	0.1201	0.1177
	8M	0.2068	0.218	0.61	0.6192	0.7938	0.6927	0.493	0.4575	0.3495	0.3436	0.1258	0.12
B. asper (Costa Rica)	0M	0.9473	0.9986	1.431	1.382	2.0167	2.0681	2.4574	2.4795	2.4325	2.4649	0.1191	0.1191
	2M	0.7174	0.7409	1.302	1.2891	1.8395	1.838	2.3618	2.279	2.2171	2.2362	0.1179	0.1172
	4M	0.465	0.4871	1.0731	1.0658	1.5461	1.5192	1.9531	1.9355	1.7736	1.7663	0.1156	0.1194
	6M	0.2947	0.3028	0.7753	0.7678	1.043	1.042	1.5016	1.4642	1.1919	1.2058	0.115	0.1178
	8M	0.1871	0.2002	0.4783	0.4822	0.5611	0.572	0.9613	0.9304	0.6949	0.7159	0.1172	0.1184
B. caribbaeus (St. Lucia)	0M	0.913	0.9795	1.5394	1.518	1.6436	1.7882	1.9681	1.9594	1.8402	1.8784	0.1194	0.1193
	2M	0.8646	0.8303	1.4269	1.4203	1.5089	1.7247	1.8088	1.8121	1.6543	1.7299	0.1124	0.1104
	4M	0.5803	0.5826	1.2478	1.1917	1.3603	1.5095	1.4111	1.4186	1.1582	1.2464	0.1152	0.1154
	6M	0.3591	0.3579	0.8846	0.875	1.1404	1.2024	1.0208	0.9894	0.7279	0.7572	0.1112	0.1125
	8M	0.2331	0.2183	0.5778	0.5564	0.7468	0.7161	0.5891	0.5621	0.4068	0.4263	0.115	0.1176
B. jararaca (Brazil)	0M	0.8728	0.9211	1.6921	1.6674	1.9032	1.9134	2.1624	2.2322	2.0757	2.0571	0.1172	0.118
	2M	0.5989	0.7529	1.5451	1.5958	1.7731	1.776	1.9431	1.9762	1.8211	1.8091	0.1187	0.1239
	4M	0.4954	0.5103	1.3175	1.3413	1.4257	1.4284	1.466	1.4797	1.2611	1.259	0.1227	0.1189
	6M	0.3118	0.336	1.0586	1.0237	1.0239	1.0173	0.9364	0.9508	0.7233	0.7253	0.1201	0.12
	8M	0.2277	0.2288	0.6821	0.6723	0.5705	0.5609	0.5476	0.5507	0.4007	0.406	0.1267	0.1265
B. lanceolatus (Martinique)	0M	0.9334	0.9585	1.366	1.399	1.9666	1.9269	2.0854	2.0937	2.0226	2.007	0.1186	0.1175
	2M	0.7262	0.7447	1.2558	1.3158	1.8971	1.8948	1.9483	1.9426	1.8146	1.8267	0.1192	0.1192
	4M	0.5107	0.5023	1.0242	1.0641	1.6755	1.6793	1.4845	1.4644	1.322	1.3019	0.1146	0.1196
	6M	0.2937	0.2994	0.7325	0.7497	1.2504	1.3288	0.9485	0.922	0.7121	0.6874	0.1219	0.1196
	8M	0.185	0.1988	0.4344	0.4396	0.6605	0.7129	0.4877	0.4574	0.3655	0.3557	0.1206	0.1201

## Sheet: Venom SVMP activity 
B. atrox(Colombia)			B. atrox(Guyana)			B. atrox(Suriname)			B. asper (Costa Rica)			B. caribbaeus (St. Lucia)			B. jararaca (Brazil)			B. lanceolatus (Martinique)			Positive			Negative
347559	291218	362926	120021	135592	115783	340148	309103	304059	106023	120252	189619	155188	125817	141956	323220	305715	286502	165419	133993	181429	457070	482133	464818	0	0	0

## Sheet: % reduction of SVMP
		Soro anticrotálico			Soro antibotrópico-crotálico			Bothrofav			PoliVap-ICP 2006			PoliVap-ICP 2013
B. atrox (Colombia)		40.5122	43.3909	37.7161	46.4019	49.1726	48.2443	48.7919	49.8542	46.7623	23.5257	22.8685	24.9593	23.3354	24.2896	21.8742
B. atrox (Guyana)		40.1138	38.4075	39.0468	69.4868	65.3722	67.7623	53.8416	52.7082	55.4667	61.107	56.4279	60.2917	58.8594	55.0567	58.7705
B. atrox (Suriname)		23.1839	22.1198	20.8368	78.8357	78.7538	74.8279	58.5118	58.1723	59.8949	57.8889	58.969	53.8144	60.9308	65.7765	61.5774
B. asper (Costa Rica)		13.256	11.4615	11.5985	47.8601	48.35	47.8676	46.781	47.1702	48.8799	69.6745	70.0724	71.6238	71.2221	71.9367	71.6869
B. caribbaeus (St. Lucia)		4.00572	5.60327	5.65405	58.1113	52.8924	53.4849	62.4606	56.8674	58.0538	65.7182	60.7461	56.3591	67.6132	63.1562	64.1778
B. jararaca (Brazil)		17.2785	12.9405	10.6166	79.1802	71.8613	77.1469	53.6429	48.1765	44.297	61.7034	56.346	56.8051	66.178	57.2707	57.9527
B. lanceolatus (Martinique)		60.605	61.9649	62.2677	73.0169	75.6767	73.3084	67.612	64.7038	65.7221	73.2081	79.0962	79.7085	58.0087	59.0418	59.9737

## Sheet: Venom coagulation activity 
B. atrox(Colombia)			B. atrox(Guyana)			B. atrox(Suriname)			B. asper (Costa Rica)			B. caribbaeus (St. Lucia)			B. jararaca (Brazil)			B. lanceolatus (Martinique)			Positive			Negative
25.44	18.79	23.75	36.43	27.96	31.04	40.75	30.19	44.65	27.03	19.28	22.39	40.75	30.19	44.65	37.62	32.49	34.61	36.77	32.35	37.78	41.52	41.67	40.95	0	0	0

## Sheet: Percetage reduction of coagula 
		Soro anticrotálico			Soro antibotrópico-crotálico			Bothrofav			PoliVap-ICP 2006			PoliVap-ICP 2013
B. atrox (Colombia)		47.4783	42.8719	33.0559	3.85093	2.58621	4.33211	6.39752	6.65444	7.4321	63.2609	69.7086	67.3722	50	52	55
B. atrox (Guyana)		33.3639	41.6852	36.4098	42.8964	44.6277	42.5063	61.6984	60.6643	67.5783	53.484	52.4744	54.9712	51.45	54.0794	52.7138
B. atrox(Suriname)		39.6557	41.9813	41.0076	38.6667	43.9813	42.0076	65.4452	60.6166	60.6519	59.7484	59.3003	58.5067	56.3721	54.2432	58.5125
B. asper (Costa Rica)		51.5521	51.6349	50.9973	14.84	14.5041	19.0164	20.7624	24.6458	20.4918	70.7189	71.2534	70.2732	77.0728	79.073	79.1216
B. caribbaeus (St. Lucia)		24.8596	24.9227	27.0835	27.2719	26.4198	24.7054	50.6867	51.397	52.1789	40.3566	42.1442	41.6278	51.0053	50.8447	52.4714
B. jararaca (Brazil)		45.6038	43.185	44.6449	44.6825	48.8104	49.8733	54.7799	56.9747	55.7774	55	53	50	50.2267	51.6454	52.2764
B. lanceolatus (Martinique)		31.3097	33.8436	32.6236	31.9373	32.0384	36.0159	45.3569	42.6341	41.1043	34.2694	36.8597	36.5608	45.3569	42.6341	41.1043

## Sheet: Fibrinogen
	E. ocellatus		Normal plasma		Venom only		Venom + Soro anticrotálico		Venom + Soro antibotrópico-crotálico		Venom + Bothrofav		Venom + PoliVap-ICP 2006		Venom + PoliVap-ICP 2013
B. atrox (Colombia)	1.57	1.29	2.98	2.56	1.29	1.18	1.96	1.96	1.96	1.75	2.23	2.56	2.23	2.56	2.23	2.23
B. atrox (Guyana)	1.57	1.29	2.98	2.56	1.96	2.56	2.23	1.96	2.23	2.56	2.56	2.56	2.23	2.56	2.23	2.56
B. atrox (Suriname)	1.57	1.29	2.98	2.56	1.42	1.75	1.96	1.96	1.96	1.75	2.23	2.56	2.23	2.56	2.23	2.23
B. asper (Costa Rica)	1.57	1.29	2.98	2.56	1.29	1.42	2.23	2.56	2.23	2.56	2.23	2.23	2.23	2.23	2.23	2.23
B. caribbaeus (St. Lucia)	1.57	1.29	2.98	2.56	1.57	1.75	1.96	1.75	2.23	1.96	2.56	2.56	2.98	2.98	2.98	2.56
B. jararaca (Brazil)	1.57	1.29	2.98	2.56	1.57	1.75	2.23	1.96	2.56	2.23	2.56	2.56	2.56	2.98	2.98	2.56
B. lanceolatus (Martinique)	1.57	1.29	2.98	2.56	1.29	1.18	1.96	2.23	2.23	2.56	1.96	2.56	1.96	2.23	1.75	1.96
